# Supplementary material
Source: Elsevier journal article supplement (https://www.sciencedirect.com/science/article/pii/S0300893224001982)
Supplement: mmc1 [file mmc1.pdf]

**SUPPLEMENTARY DATA**

**Table 1 of the supplementary data**

Baseline clinical characteristics according to coronary lesions associated with ischemic territory

| Variables                                | Nonculprit LM/pLAD (n = 108) | Culprit LM/pLAD (n = 228) | No involvement of LM/pLAD | P      |
|------------------------------------------|------------------------------|---------------------------|---------------------------|--------|
| <b>Demographics</b>                      |                              |                           |                           |        |
| <i>Age, y</i>                            | 67.7 ± 11.5                  | 66.4 ± 12.4               | 68.6 ± 12.0               | .16    |
| <i>Male sex</i>                          | 76 (70.4)                    | 176 (77.2)                | 139 (69.5)                | .16    |
| <i>Body mass index, kg/m<sup>2</sup></i> | 23.4 ± 3.3                   | 23.8 ± 3.4                | 23.5 ± 3.3                | .51    |
| <b>Risk factors</b>                      |                              |                           |                           |        |
| <i>Hypertension</i>                      | 61 (56.5)                    | 125 (54.8)                | 130 (65.0)                | .09    |
| <i>Diabetes mellitus</i>                 | 42 (38.9)                    | 82 (36.0)                 | 86 (43.0)                 | .33    |
| <i>Chronic kidney disease</i>            | 12 (11.1)                    | 20 (8.8)                  | 19 (9.5)                  | .79    |
| <i>Current smoking</i>                   | 34 (31.5)                    | 86 (37.7)                 | 64 (32.0)                 | .36    |
| <i>Previous PCI</i>                      | 19 (17.6)                    | 30 (13.2)                 | 25 (12.5)                 | .43    |
| <i>Previous myocardial infarction</i>    | 16 (14.8)                    | 32 (14.0)                 | 26 (13.0)                 | .90    |
| <i>Peripheral artery disease</i>         | 3 (2.8)                      | 6 (2.6)                   | 10 (5.0)                  | .37    |
| <i>Previous history of stroke</i>        | 9 (8.3)                      | 20 (8.8)                  | 22 (11.0)                 | .66    |
| <b>Clinical manifestation</b>            |                              |                           |                           |        |
| <i>Initial presentation</i>              |                              |                           |                           | .62    |
| NSTEMI                                   | 38 (35.2)                    | 69 (30.3)                 | 67 (33.5)                 |        |
| STEMI                                    | 70 (64.8)                    | 159 (69.7)                | 133 (66.5)                |        |
| LVEF, %                                  | 34.8 ± 15.3                  | 30.3 ± 14.3               | 41.8 ± 14.4               | < .001 |

|                                   |               |               |               |       |
|-----------------------------------|---------------|---------------|---------------|-------|
| Systolic blood pressure,          | 74.5 ± 29.9   | 69.6 ± 30.5   | 77.0 ± 25.8   | .03   |
| Diastolic blood pressure,         | 49.3 ± 21.3   | 45.2 ± 20.5   | 47.8 ± 17.8   | .16   |
| Heart rate, beats/min             | 79.7 ± 37.4   | 82.5 ± 34.0   | 74.8 ± 30.5   | .06   |
| <i>Laboratory findings</i>        |               |               |               |       |
| Hemoglobin, g/dL                  | 12.8 ± 2.2    | 13.2 ± 2.3    | 12.8 ± 2.4    | .27   |
| Creatinine, mg/dL                 | 1.6 ± 1.2     | 1.5 ± 1.5     | 1.6 ± 1.3     | .89   |
| Glucose, mg/dL                    | 235.8 ± 110.2 | 235.8 ± 114.2 | 236.5 ± 134.3 | .99   |
| Lactic acid, mmol/L               | 6.3 ± 3.2     | 6.5 ± 3.5     | 6.0 ± 3.6     | .34   |
| Peak troponin I, ng/mL            | 84.2 ± 212.2  | 92.4 ± 152.2  | 70.6 ± 172.1  | .43   |
| <b>Shock severity</b>             |               |               |               |       |
| <i>SCAI shock classification*</i> |               |               |               | <.001 |
| C or D                            | 43 (39.8)     | 75 (32.9)     | 112 (56.0)    |       |
| E                                 | 65 (60.2)     | 153 (67.1)    | 88 (44.0)     |       |
| Undergoing CPR                    | 27 (25.0)     | 71 (31.1)     | 32 (16.0)     | .001  |
| Vasoactive Inotropic              | 80.0 ± 116.7  | 98.0 ± 176.2  | 79.3 ± 185.1  | .46   |
| IABP-SHOCK 2 score                | 3.0 ± 1.7     | 3.0 ± 1.6     | 3.2 ± 1.8     | .70   |
| <b>In-hospital management</b>     |               |               |               |       |
| <i>Use of multiple vasoactive</i> | 56 (51.9)     | 135 (59.2)    | 103 (51.5)    | .22   |
| <i>Mechanical ventilation</i>     | 62 (57.4)     | 160 (70.2)    | 99 (49.5)     | <.001 |
| <i>Requiring RRT</i>              | 21 (19.4)     | 47 (20.6)     | 32 (16.0)     | .46   |
| <i>Requiring IABP</i>             | 39 (36.1)     | 80 (35.1)     | 50 (25.0)     | .04   |
| <i>Requiring ECMO</i>             | 39 (36.1)     | 117 (51.3)    | 50 (25.0)     | <.001 |
| <i>ECMO site bleeding</i>         | 6/39 (15.4)   | 17/117 (14.5) | 8/50 (16.0)   | .97   |
| <i>Limb ischemia</i>              | 3/39 (7.7)    | 5/117 (4.3)   | 2/50 (4.0)    | .66   |

CPR, cardiopulmonary resuscitation; ECMO, extracorporeal membrane oxygenation; IABP, intra-aortic balloon pump; IABP-SHOCK, intra-aortic balloon pump in cardiogenic shock; LM, left main coronary artery; LVEF, left ventricular ejection fraction; NSTEMI, non–ST-segment elevation myocardial infarction; PCI, percutaneous coronary intervention; pLAD, proximal left anterior descending artery; RRT, renal-replacement therapy; SCAI, Society for Cardiovascular Angiography and Intervention; STEMI, ST-segment elevation myocardial infarction.

Values are presented as No. (%) or mean  $\pm$  standard deviations.

*P* value for comparison between culprit-only and multivessel PCI among patients with LM/pLAD lesions and without LM/pLAD lesions.

\*SCAI shock classification E was defined as patients requiring ECMO, who were undergoing CPR, with a lactate level of  $> 5$  mmol/L, or with a vasoactive inotropic score  $> 90$ .

**Table 2 of the supplementary data**

Baseline angiographic and procedural characteristics according to coronary lesions associated with ischemic territory

| Variables                                | Nonculprit LM/pLAD (n = 108) | Culprit LM/pLAD (n = 228) | No involvement of LM/pLAD (n = 200) | P      |
|------------------------------------------|------------------------------|---------------------------|-------------------------------------|--------|
| <b>Angiographic findings</b>             |                              |                           |                                     |        |
| <i>Culprit location</i>                  |                              |                           |                                     |        |
| LM                                       | 0 (0)                        | 86 (37.7)                 | 0 (0)                               | < .001 |
| LAD                                      | 30 (27.8)                    | 186 (81.6)                | 62 (31.0)                           | < .001 |
| LCx                                      | 29 (26.9)                    | 0 (0)                     | 37 (18.5)                           | < .001 |
| RCA                                      | 58 (53.7)                    | 0 (0)                     | 114 (57.0)                          | < .001 |
| <i>Culprit TIMI flow grade, pre-PCI</i>  |                              |                           |                                     | .54    |
| 0                                        | 57 (52.8)                    | 114 (50.0)                | 113 (56.5)                          |        |
| 1                                        | 8 (7.4)                      | 29 (12.7)                 | 16 (8.0)                            |        |
| 2                                        | 19 (17.6)                    | 37 (16.2)                 | 35 (17.5)                           |        |
| 3                                        | 24 (22.2)                    | 48 (21.1)                 | 36 (18.0)                           |        |
| <i>Culprit TIMI flow grade, post-PCI</i> |                              |                           |                                     | .22    |
| 0                                        | 3 (2.7)                      | 3 (1.3)                   | 3 (1.5)                             |        |
| 1                                        | 0 (0)                        | 7 (3.1)                   | 4 (2.0)                             |        |
| 2                                        | 8 (7.4)                      | 27 (11.8)                 | 30 (15.0)                           |        |

|                                            |              |              |              |        |
|--------------------------------------------|--------------|--------------|--------------|--------|
| 3                                          | 97 (89.8)    | 191 (83.8)   | 163 (81.5)   |        |
| <i>Vessel disease</i>                      |              |              |              | < .001 |
| 2-vessel disease                           | 41 (38.0)    | 138 (60.5)   | 116 (58.0)   |        |
| 3-vessel disease                           | 67 (62.0)    | 90 (39.5)    | 84 (42.0)    |        |
| SYNTAX score                               | 30.8 ± 10.2  | 28.1 ± 9.5   | 19.8 ± 9.1   | < .001 |
| Non-culprit CTO lesion                     | 34 (31.5)    | 51 (22.4)    | 56 (28.0)    | .16    |
| Non-culprit vessel diameter stenosis       | 87.7 ± 12.1  | 80.9 ± 16.6  | 81.5 ± 16.7  | .001   |
| Non-culprit vessel diameter stenosis ≥ 70% | 40 (37.0)    | 45 (19.7)    | 42 (21.0)    | .001   |
| <b>Procedural characteristics</b>          |              |              |              |        |
| <i>Access site</i>                         |              |              |              | .15    |
| Femoral artery                             | 96 (88.9)    | 186 (81.6)   | 161 (80.5)   |        |
| Radial artery                              | 12 (11.1)    | 42 (18.4)    | 39 (19.5)    |        |
| Contrast volume, mL                        | 198.5 ± 79.4 | 190.7 ± 84.1 | 170.7 ± 69.4 | .28    |
| Implanted device                           |              |              |              | .57    |
| Second-generation DES                      | 99 (91.7)    | 214 (93.9)   | 182 (91.0)   |        |
| Balloon angioplasty or thrombectomy only   | 8 (7.4)      | 13 (5.7)     | 14 (7.0)     |        |
| <i>Others</i>                              | 1 (0.9)      | 1 (0.4)      | 4 (2.0)      |        |

|                                 |             |             |             |      |
|---------------------------------|-------------|-------------|-------------|------|
| Number of stents                | 1.6 ± 1.1   | 1.4 ± 0.7   | 1.3 ± 0.8   | .001 |
| Thrombus aspiration             | 23 (21.3)   | 63 (27.6)   | 73 (36.5)   | .01  |
| Glycoprotein IIb/IIIa inhibitor | 16 (14.8)   | 31 (13.6)   | 43 (21.5)   | .08  |
| Performed staged PCI            | 14 (13.0)   | 13 (5.7)    | 27 (13.5)   | .02  |
| Timing staged PCI, days         | 5 [3.0-9.0] | 4 [1.0-7.0] | 4 [3.0-7.0] | .52  |
| Complete revascularization      | 23 (21.3)   | 64 (28.1)   | 34 (17.0)   | .02  |

CTO, chronic total coronary occlusion; DES, drug-eluting stent; LAD, left anterior descending artery; LCx; left circumflex artery; LM; left main coronary artery;

PCI; percutaneous coronary intervention; RCA; right coronary artery; TIMI; Thrombolysis in Myocardial Infarction.

Values are presented as No. (%), mean ± standard deviations, or median [interquartile range].

*P* value for comparison between culprit-only and multivessel PCI among patients with LM/pLAD lesions and without LM/pLAD lesions.

**Table 3 of the supplementary data**

Comparison of clinical outcomes according to revascularization strategy

| Variables                              | Culprit lesion-only PCI<br>(n = 369) | Immediate multivessel PCI<br>(n = 167) | Univariate analysis |           |     | Multivariate analysis <sup>a</sup> |           |     |
|----------------------------------------|--------------------------------------|----------------------------------------|---------------------|-----------|-----|------------------------------------|-----------|-----|
|                                        |                                      |                                        | HR                  | 95%CI     | P   | HR                                 | 95%CI     | P   |
| POCE <sup>b</sup>                      | 163 (49.4)                           | 70 (46.0)                              | 0.90                | 0.68-1.19 | .45 | 0.77                               | 0.57-1.03 | .08 |
| All-cause mortality                    | 139 (40.7)                           | 55 (34.1)                              | 0.84                | 0.61-1.14 | .26 | 0.75                               | 0.54-1.03 | .08 |
| Cardiac mortality                      | 114 (33.2)                           | 48 (29.7)                              | 0.89                | 0.64-1.25 | .52 | 0.73                               | 0.51-1.04 | .08 |
| Myocardial infarction                  | 4 (1.4)                              | 5 (4.3)                                | 2.68                | 0.72-9.97 | .14 | 1.47                               | 0.35-6.23 | .60 |
| Rehospitalization due to heart failure | 16 (9.1)                             | 11 (12.7)                              | 1.35                | 0.63-2.91 | .44 | 1.38                               | 0.58-3.28 | .46 |
| Repeat revascularization               | 13 (7.8)                             | 3 (4.4)                                | 0.42                | 0.12-1.49 | .18 | 0.34                               | 0.09-1.30 | .11 |

95%CI, 95% confidence interval; CPR, cardiopulmonary resuscitation; ECMO, extracorporeal membrane oxygenation; HR, hazard ratio; PCI, percutaneous coronary intervention; POCE, patient-oriented composite endpoint; SCAI, Society for Cardiovascular Angiography and Intervention.

Unless otherwise stated, values are expressed as No. (%).

The cumulative incidence of clinical outcomes is presented as event number and Kaplan-Meier estimates at 12 months from the index procedure.

<sup>a</sup> Adjusted variables included age, sex, history of chronic kidney disease, severe left ventricular systolic dysfunction (ejection fraction < 30%), ST-segment elevation myocardial infarction, systolic blood pressure, blood creatinine, SCAI shock classification E, undergoing CPR, multiple vasoactive drugs, mechanical ventilation, requiring ECMO, SYNTAX score, and transradial approach.

<sup>b</sup> POCE was defined as a composite of all-cause mortality, myocardial infarction, re-hospitalization due to heart failure, and repeat revascularization.
